# Supplementary material for: Overcoming Waste Management Challenges in Costa Rica: Evaluating Practices, Government Initiatives, and Future Strategies
Source: Preprints.org preprint supplement (doi:10.20944/preprints202408.0274.v3), 2024-08-20
Supplement: Supplementary file 1 [file supplementary]

**S1.Number of Laboratories Performing Six Waste Minimization Practices (2015-2023)**

| **Year** | **SNM** | **CT** | **D** | **RSC** | **RS** | **PL** |
| --- | --- | --- | --- | --- | --- | --- |
| 2015 | 25 | 32 | 36 | 52 | 55 | 58 |
| 2016 | 28 | 35 | 38 | 54 | 57 | 60 |
| 2017 | 30 | 38 | 40 | 57 | 60 | 63 |
| 2018 | 33 | 40 | 42 | 60 | 63 | 65 |
| 2019 | 35 | 42 | 45 | 62 | 65 | 68 |
| 2020 | 38 | 45 | 48 | 65 | 68 | 70 |
| 2021 | 40 | 48 | 50 | 68 | 70 | 73 |
| 2022 | 42 | 50 | 53 | 70 | 73 | 75 |
| 2023 | 45 | 53 | 55 | 73 | 75 | 78 |

**S2.Number of Laboratories Performing Five Waste Minimization Practices (2015-2023)**

| **Year** | **PC** | **CS** | **RSC** | **RS** | **PL** |
| --- | --- | --- | --- | --- | --- |
| 2015 | 35 | 28 | 52 | 55 | 58 |
| 2016 | 38 | 30 | 54 | 57 | 60 |
| 2017 | 40 | 32 | 57 | 60 | 63 |
| 2018 | 43 | 35 | 60 | 63 | 65 |
| 2019 | 45 | 38 | 62 | 65 | 68 |
| 2020 | 48 | 40 | 65 | 68 | 70 |
| 2021 | 50 | 42 | 68 | 70 | 73 |
| 2022 | 53 | 45 | 70 | 73 | 75 |
| 2023 | 55 | 48 | 73 | 75 | 78 |

**S3.Annual Percentage Variation for Six Waste Minimization Practices (2015-2023)**

| **Year** | **SNM (%)** | **CT (%)** | **D (%)** | **RSC (%)** | **RS (%)** | **PL (%)** |
| --- | --- | --- | --- | --- | --- | --- |
| 2015 | 0 | 0 | 0 | 0 | 0 | 0 |
| 2016 | 12 | 9 | 6 | 4 | 4 | 4 |
| 2017 | 7 | 8 | 5 | 5 | 5 | 5 |
| 2018 | 10 | 5 | 5 | 5 | 5 | 5 |
| 2019 | 6 | 5 | 7 | 3 | 3 | 5 |
| 2020 | 9 | 7 | 7 | 5 | 5 | 5 |
| 2021 | 5 | 6 | 5 | 5 | 3 | 4 |
| 2022 | 5 | 4 | 6 | 3 | 4 | 3 |
| 2023 | 7 | 6 | 5 | 5 | 3 | 4 |

**S4.Annual Percentage Variation for Five Waste Minimization Practices (2015-2023)**

| **Year** | **PC (%)** | **CS (%)** | **RSC (%)** | **RS (%)** | **PL (%)** |
| --- | --- | --- | --- | --- | --- |
| 2015 | 0 | 0 | 0 | 0 | 0 |
| 2016 | 9 | 7 | 4 | 4 | 4 |
| 2017 | 5 | 7 | 5 | 5 | 5 |
| 2018 | 7 | 9 | 5 | 5 | 5 |
| 2019 | 5 | 8 | 3 | 3 | 5 |
| 2020 | 6 | 5 | 5 | 5 | 5 |
| 2021 | 4 | 5 | 5 | 3 | 4 |
| 2022 | 5 | 5 | 3 | 4 | 3 |
| 2023 | 4 | 6 | 5 | 3 | 4 |
